# Supplementary material for: Regulation of a PRMT5/NF-κB Axis by Phosphorylation of PRMT5 at Serine 15 in Colorectal Cancer
Source: MDPI journal article supplement (doi:10.3390/ijms21103684), 2020-05-23
Supplement: s1 [file s1]

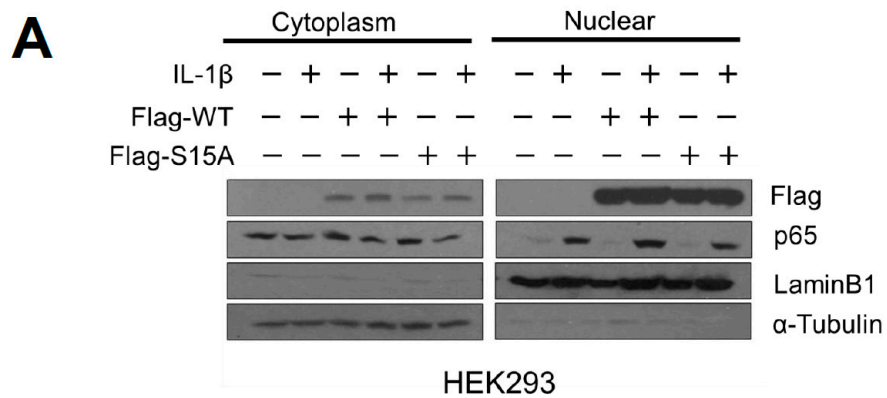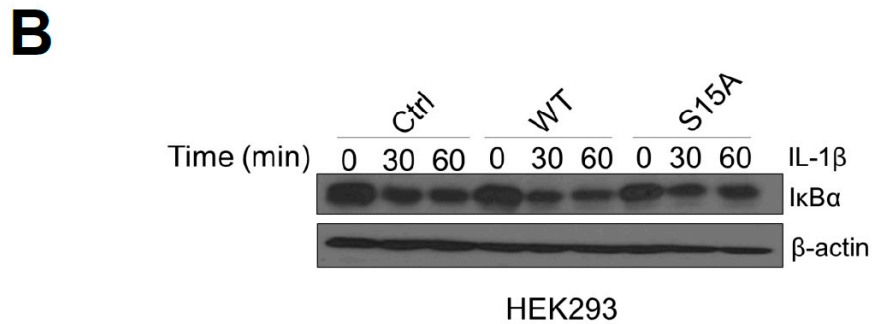

**Figure S2.** Effect of S15A mutant on PRMT5 subcellular localization, p65 nuclear translocation and I $\kappa$ B $\alpha$  degradation. (A) Cell fractionation assay, showing subcellular compartmentalization of Flag-PRMT5 and Flag-S15A in HEK293 cells. Western blot was probed with anti-FLAG, p65, LaminB1 and  $\alpha$ -tubulin antibodies. (B) Western blot, showing IL-1 $\beta$ -induced I $\kappa$ B $\alpha$  degradation pattern in WT-PRMT5 and S15A HEK293 cells.

| ACCESSION NO.  | TargetID   | S15A-PRMT5 +IL-1 $\beta$ /WT+IL-1 $\beta$ |
|----------------|------------|-------------------------------------------|
| NM_001115.1    | ADCY8      | 0.45                                      |
| NM_014391.2    | ANKRD1     | 0.38                                      |
| NM_020373.2    | ANO2       | 0.15                                      |
| XR_041624.1    | C10ORF85   | 0.36                                      |
| XR_041485.1    | C13ORF29   | 0.27                                      |
| XM_001726191.1 | C19ORF29OS | 0.00                                      |
| NM_178342.2    | C3ORF35    | 0.50                                      |
| NM_018452.3    | C6ORF35    | 0.32                                      |
| NM_145028.3    | C6ORF81    | 0.16                                      |
| NM_152786.1    | C9ORF43    | 0.33                                      |
| NM_001742.2    | CALCR      | 0.24                                      |
| NM_175931.1    | CBFA2T3    | 0.28                                      |
| NM_138414.1    | CCDC101    | 0.41                                      |
| NM_015603.1    | CCDC9      | 0.48                                      |
| NM_004591.1    | CCL20      | 0.37                                      |
| NM_207007.2    | CCL4L2     | 0.47                                      |
| NM_145057.2    | CDC42EP5   | 0.41                                      |
| NM_000735.2    | CGA        | 0.33                                      |
| NM_000737.2    | CGB        | 0.45                                      |
| NM_024111.2    | CHAC1      | 0.00                                      |
| NM_015557.1    | CHD5       | 0.27                                      |
| NM_024944.2    | CHODL      | 0.47                                      |
| NM_138429.1    | CLDN15     | 0.49                                      |
| NM_080645.2    | COL12A1    | 0.22                                      |
| NM_002089.3    | CXCL2      | 0.29                                      |
| NM_016229.3    | CYB5R2     | 0.36                                      |
| NM_000779.2    | CYP4B1     | 0.31                                      |
| NR_024064.1    | DAD1L      | 0.39                                      |
| NM_006557.4    | DMRT2      | 0.28                                      |
| NR_024595.1    | DNM1P35    | 0.06                                      |
| NM_133637.1    | DQX1       | 0.37                                      |
| NM_004428.2    | EFNA1      | 0.48                                      |
| NM_007036.2    | ESM1       | 0.22                                      |
| NM_153606.2    | FAM71A     | 0.50                                      |
| NM_001012426.1 | FOXP4      | 0.06                                      |
| NM_000148.2    | FUT1       | 0.35                                      |

|                |              |      |
|----------------|--------------|------|
| NM_002068.1    | GNA15        | 0.40 |
| XM_935238.1    | GOLGA8F      | 0.45 |
| BX109627       | HS.130639    | 0.46 |
| AI801879       | HS.144030    | 0.14 |
| BU633914       | HS.25555     | 0.27 |
| AK026734       | HS.287720    | 0.34 |
| AF339771       | HS.344872    | 0.19 |
| CD695721       | HS.538157    | 0.00 |
| AI253067       | HS.541845    | 0.20 |
| U10515         | HS.544238    | 0.46 |
| AI628074       | HS.545238    | 0.13 |
| NM_130770.2    | HTR3C        | 0.28 |
| NM_172200.1    | IL15RA       | 0.17 |
| NM_001012633.1 | IL32         | 0.49 |
| NM_000564.2    | IL5RA        | 0.50 |
| NM_000584.2    | IL8          | 0.48 |
| NM_002195.1    | INSL4        | 0.30 |
| XM_934728.1    | KIAA0565     | 0.09 |
| NM_138343.2    | KLC4         | 0.02 |
| NM_002774.3    | KLK6         | 0.34 |
| NM_004139.2    | LBP          | 0.29 |
| NM_001010939.1 | LIPJ         | 0.18 |
| NM_033029.2    | LMLN         | 0.15 |
| XM_001724965.1 | LOC100129268 | 0.13 |
| XM_001716704.1 | LOC100130288 | 0.15 |
| XM_001718675.1 | LOC100130705 | 0.50 |
| XM_001714361.1 | LOC100131999 | 0.18 |
| XR_038987.1    | LOC100132496 | 0.37 |
| XM_001724630.1 | LOC100132716 | 0.05 |
| XM_001726146.1 | LOC100132839 | 0.06 |
| XM_001721522.1 | LOC100134009 | 0.18 |
| XM_001720931.1 | LOC100134041 | 0.14 |
| XM_001715304.1 | LOC100134081 | 0.00 |
| XM_001721704.1 | LOC100134170 | 0.19 |
| XM_001714134.1 | LOC100134499 | 0.00 |
| NM_178514.3    | LOC283487    | 0.26 |
| XM_944838.2    | LOC285733    | 0.27 |
| XM_939888.1    | LOC339742    | 0.49 |
| XM_370865.4    | LOC388122    | 0.23 |

|                |           |      |
|----------------|-----------|------|
| XM_374766.2    | LOC399715 | 0.11 |
| XM_495854.3    | LOC440013 | 0.10 |
| XM_001717499.1 | LOC642076 | 0.04 |
| NR_024495.1    | LOC642826 | 0.40 |
| XM_927139.1    | LOC643869 | 0.14 |
| XM_933938.2    | LOC643872 | 0.38 |
| XM_928663.1    | LOC645649 | 0.03 |
| XR_037491.1    | LOC646808 | 0.46 |
| XM_943707.1    | LOC649431 | 0.33 |
| XM_941853.1    | LOC652416 | 0.00 |
| XM_928640.1    | LOC653651 | 0.39 |
| XM_001126803.1 | LOC728185 | 0.36 |
| XR_015405.1    | LOC728895 | 0.43 |
| XM_001130993.1 | LOC729675 | 0.23 |
| XM_001714434.1 | LOC730376 | 0.40 |
| NM_002343.2    | LTF       | 0.01 |
| NM_012323.2    | MAFF      | 0.44 |
| NM_005204.2    | MAP3K8    | 0.39 |
| NM_052858.3    | MARVELD3  | 0.33 |
| NM_033290.1    | MID1      | 0.33 |
| NR_030209.1    | MIR518E   | 0.31 |
| NM_173855.3    | MORN3     | 0.40 |
| NM_013404.3    | MSLN      | 0.21 |
| NM_003828.2    | MTMR1     | 0.45 |
| NM_001005474.1 | NFKBIZ    | 0.47 |
| NM_001080379.1 | PACRG     | 0.01 |
| NM_000438.3    | PAX3      | 0.27 |
| NM_003706.1    | PLA2G4C   | 0.41 |
| NM_002658.2    | PLAU      | 0.44 |
| XM_940486.1    | PLEKHA2   | 0.26 |
| NM_014330.2    | PPP1R15A  | 0.46 |
| NM_022114.2    | PRDM16    | 0.11 |
| NM_000963.1    | PTGS2     | 0.32 |
| NM_000963.1    | PTGS2     | 0.40 |
| NM_001024455.2 | RGAG4     | 0.43 |
| NM_184237.1    | RNPC2     | 0.48 |
| NM_001007098.1 | SCP2      | 0.40 |
| NM_000450.1    | SELE      | 0.22 |
| NM_013386.3    | SLC25A24  | 0.41 |

|                |            |      |
|----------------|------------|------|
| NR_003237.1    | SNORD113-9 | 0.34 |
| XM_291729.7    | TAF3       | 0.38 |
| NM_031898.1    | TEKT3      | 0.16 |
| NM_001001524.2 | TM6SF2     | 0.10 |
| NM_001097620.1 | TMEM184A   | 0.08 |
| NM_002160.2    | TNC        | 0.45 |
| NM_002160.1    | TNC        | 0.44 |
| NM_006290.2    | TNFAIP3    | 0.28 |
| NM_001561.4    | TNFRSF9    | 0.50 |
| NM_033229.2    | TRIM15     | 0.41 |
| NM_020810.2    | TRMT5      | 0.21 |
| NM_001080419.1 | UNK        | 0.50 |
| NM_030570.2    | UPK3B      | 0.39 |
| NM_001078.2    | VCAM1      | 0.15 |
| NM_206923.1    | YY2        | 0.30 |
| NM_145271.3    | ZNF688     | 0.18 |

**Figure S3.** Full list of genes downregulated by the S15A-PRMT5 mutation. Fold change is represented as  $S15A-PRMT5 +IL-1\beta/WT+IL-1\beta \leq 0.5$
